# Supplementary material for: In SilicoGenome Comparison and Distribution Analysis of Simple Sequences Repeats in Cassava
Source: Hindawi journal article supplement (doi:10.1155/2014/471461), 2014-01-01

Supplementary figure 1: Number of coding sequences in each GO subcategory for a) biological process, b) cellular component category and c) molecular function.

a)

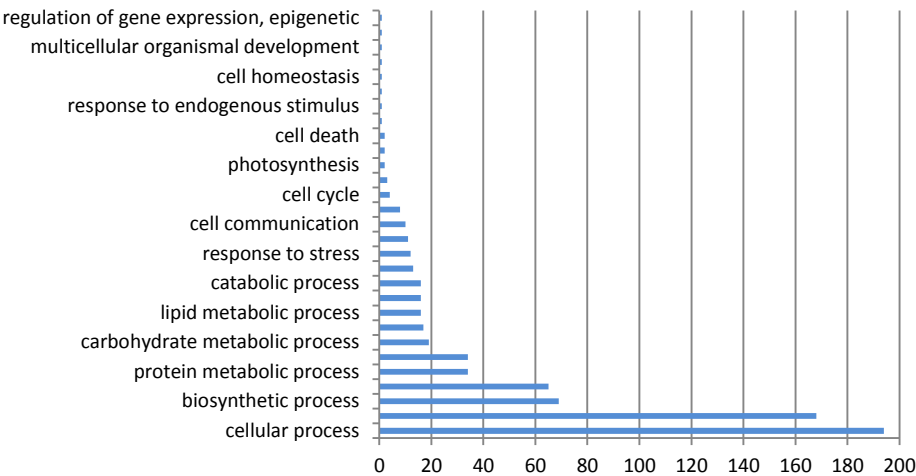

b)

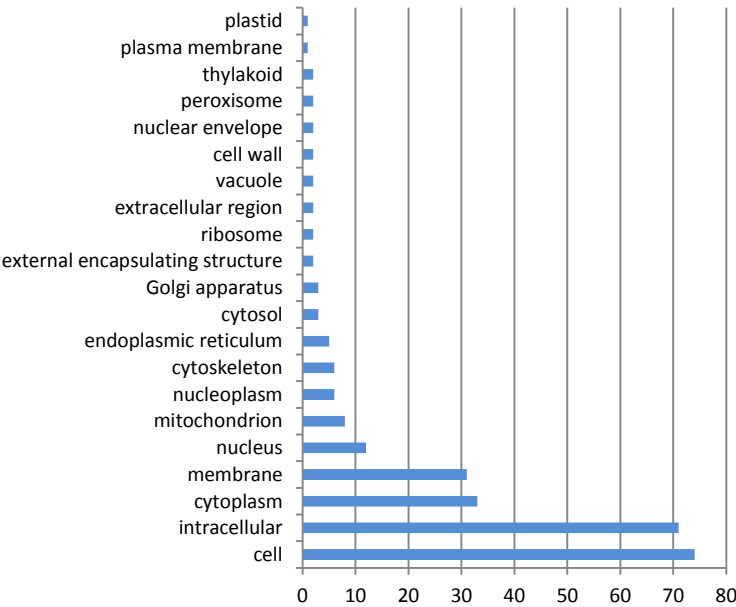

c)

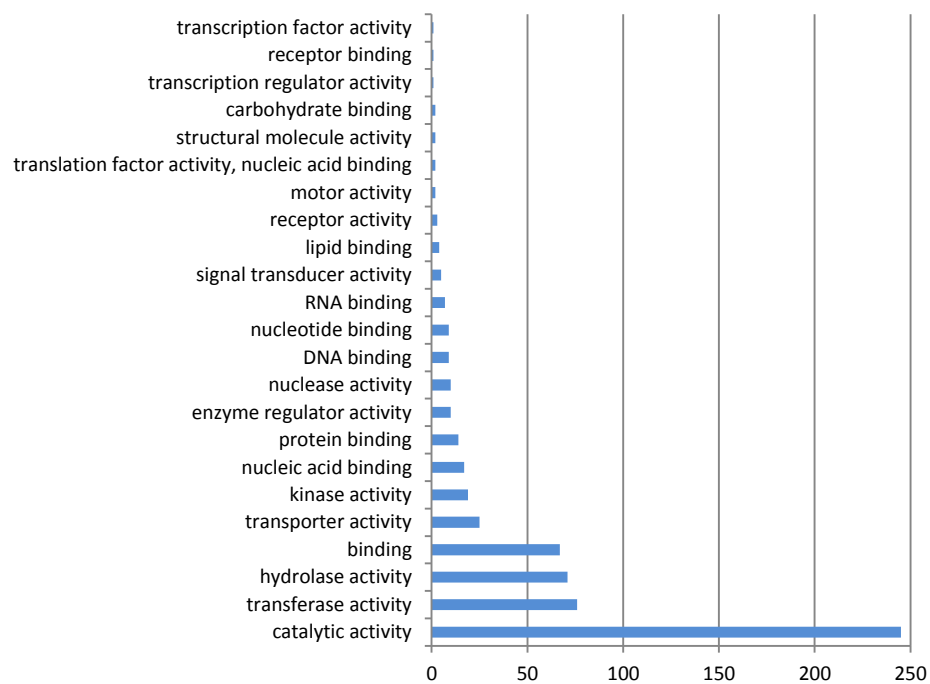

Supplementary figure 2: Number of intron sequences in each GO subcategory for a) biological process, b) cellular component category and c) molecular function.

a)

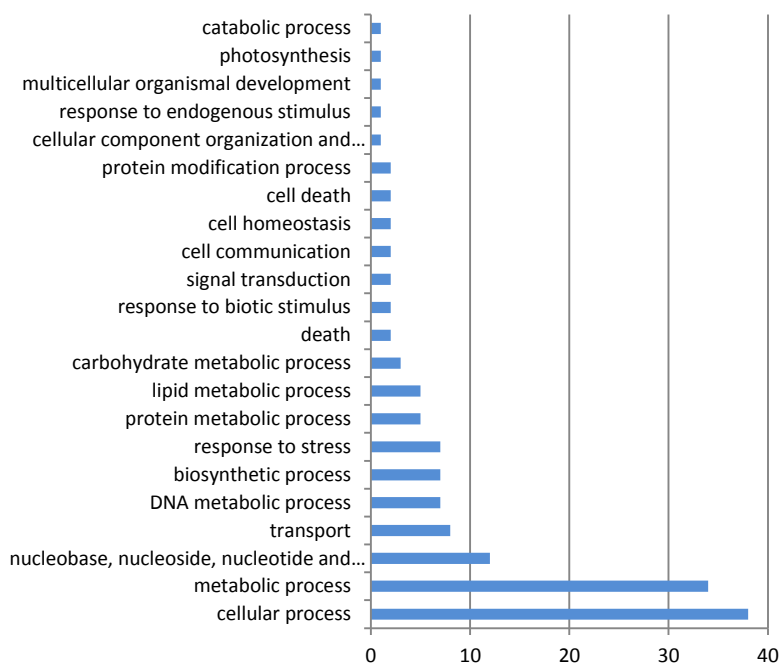

b)

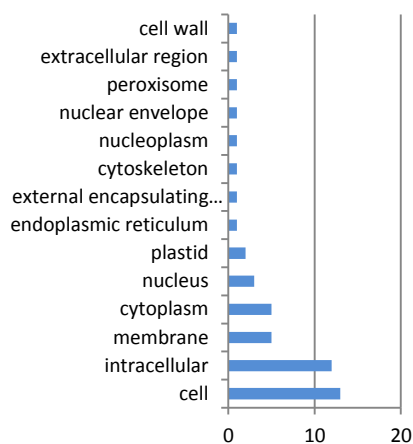

c)

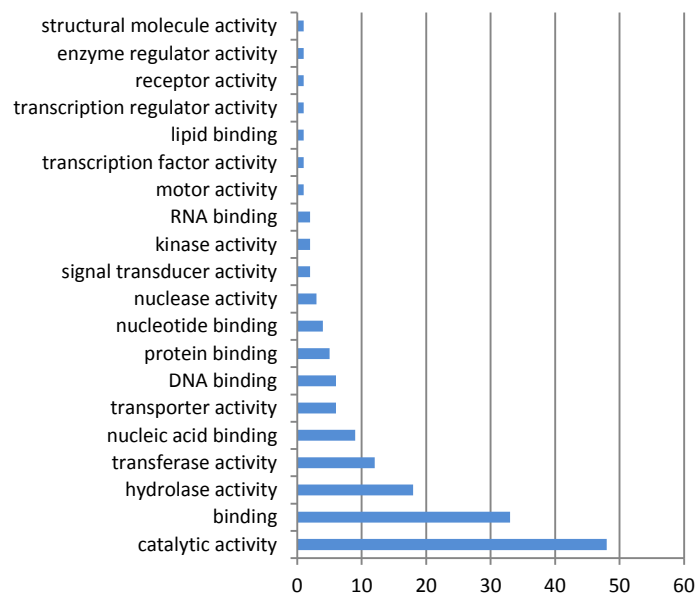

Supplementary figure 3: Number of the 5'UTRs sequences in each GO subcategory a) biological process, b) cellular component category and c) molecular function.

a)

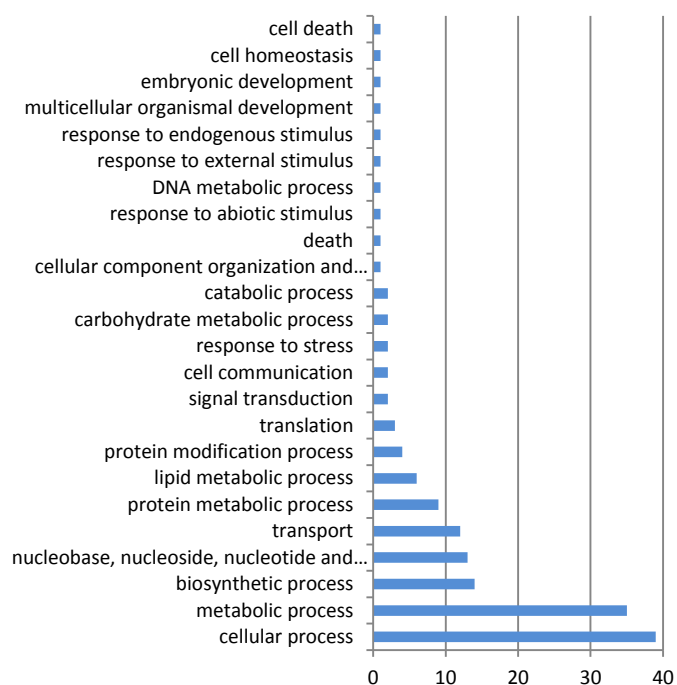

b)

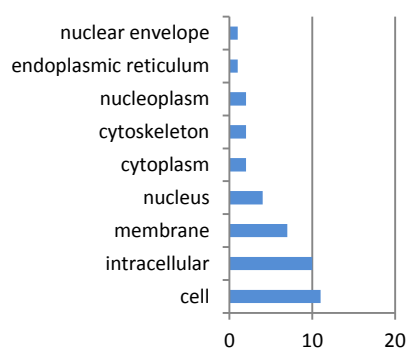

c)

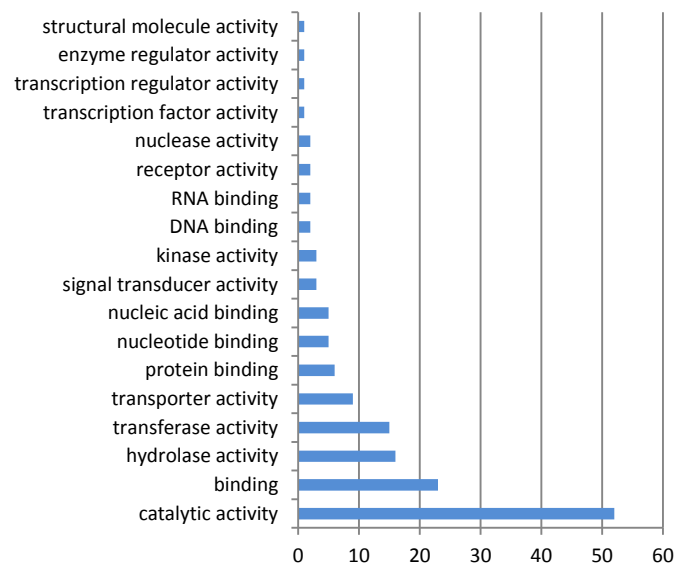

Supplementary figure 4: Number of 3' UTRs sequences in each GO subcategory for a) biological process, b) cellular component category and c) molecular function.

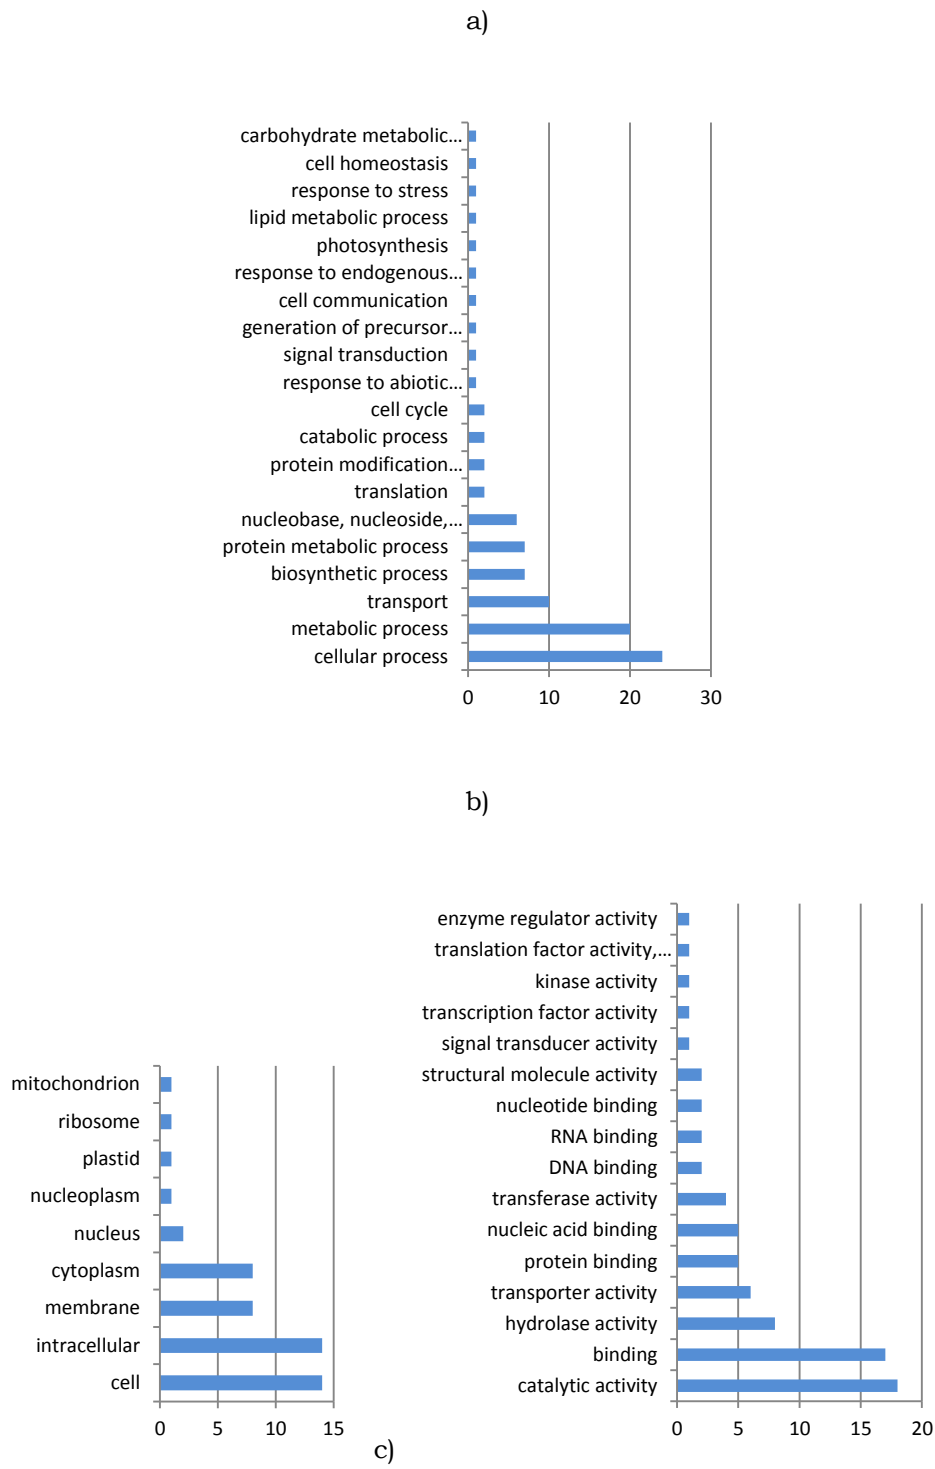

Supplement: f1 [file 471461.f1.pdf]
